# Supplementary material for: circAMOTL1 Motivates AMOTL1 Expression to Facilitate Cervical Cancer Growth
Source: PubMed Central journal article supplement — Mol Ther Nucleic Acids. 2019 Sep 30;19:50–60. doi: 10.1016/j.omtn.2019.09.022 (PMC6906701; doi:10.1016/j.omtn.2019.09.022), 2019-09-30

OMTN, Volume 19

## **Supplemental Information**

### **circAMOTL1 Motivates AMOTL1 Expression to Facilitate Cervical Cancer Growth**

**Rongying Ou, Jiangmin Lv, Qianwen Zhang, Fan Lin, Li Zhu, Fangfang Huang, Xiangyun Li, Tian Li, Liang Zhao, Yi Ren, and Yunsheng Xu**

## Figure legends

**Supplementary Figure 1 (A-B)** qRT-PCR and northern blot analysis of four circular forms of *Amotl1* in normal cervical cell and four cervical cancer cells. (C) Co-localization of circ\_ *Amotl1* and miR-485-5p in CaSki cell. n.s: no significance.

**Supplementary Figure 2 (A)** mRNA level of *c-myc* was examined in cervical cancer cells after overexpression or knockdown of circ\_ *Amotl1*. (B) Western blot analysis was applied to detect protein level of *c-myc* in transfected CaSki or HeLa cells. n.s: no significance.

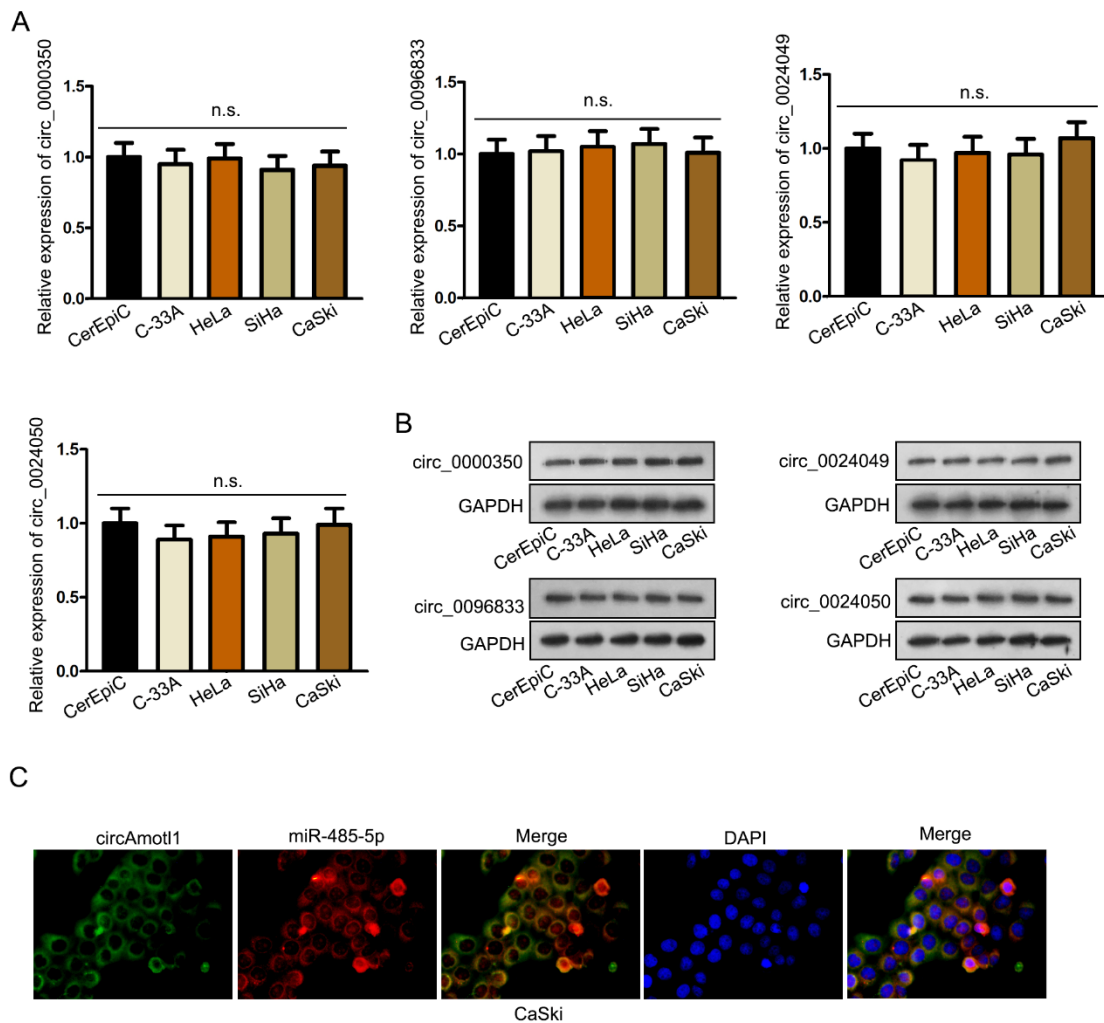

A

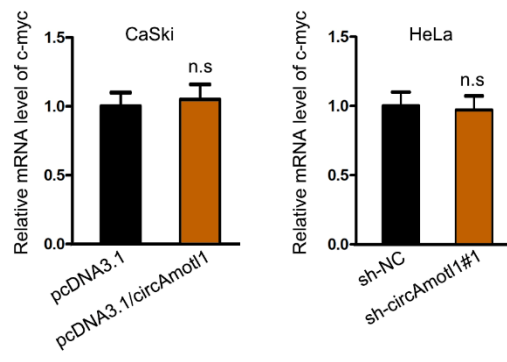

B

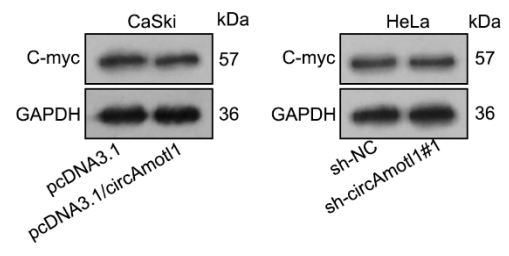

Supplement: mmc1.pdf [file mmc1.pdf]
